# Supplementary material for: Carbonized polyaniline coupled molybdenum disulfide/graphene nanosheets for high performance lithium ion battery anodes
Source: Royal Society of Chemistry journal article supplement (doi:10.1039/c5ra12750e), 2015-01-01
Supplement: c5ra12750e1.pdf [file c5ra12750e1.pdf]

## Supporting Information

### Carbonized Polyaniline Coupled Molybdenum Disulfide/Graphene Nanosheets for High Performance Lithium Ion Battery Anodes

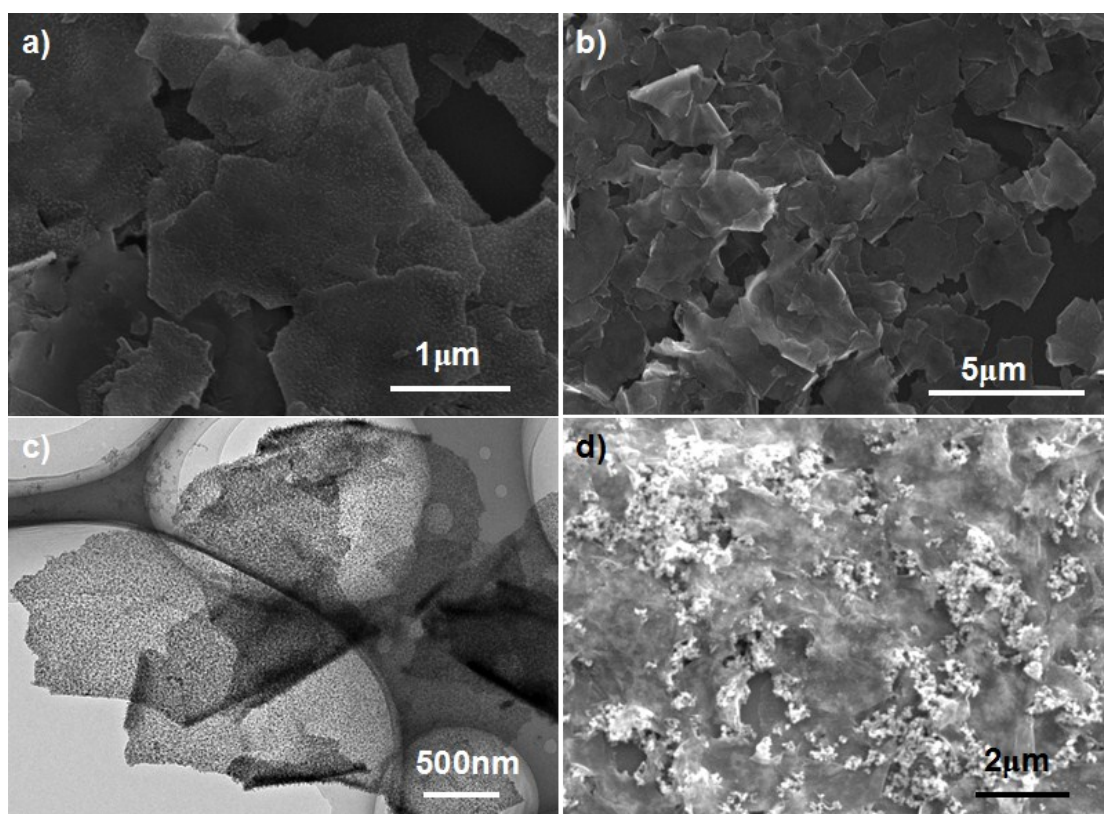

Figure S1. a,b) SEM images and c) TEM images of MoS<sub>3</sub>-PANI-GO; d) SEM images of MoS<sub>3</sub>-GO.

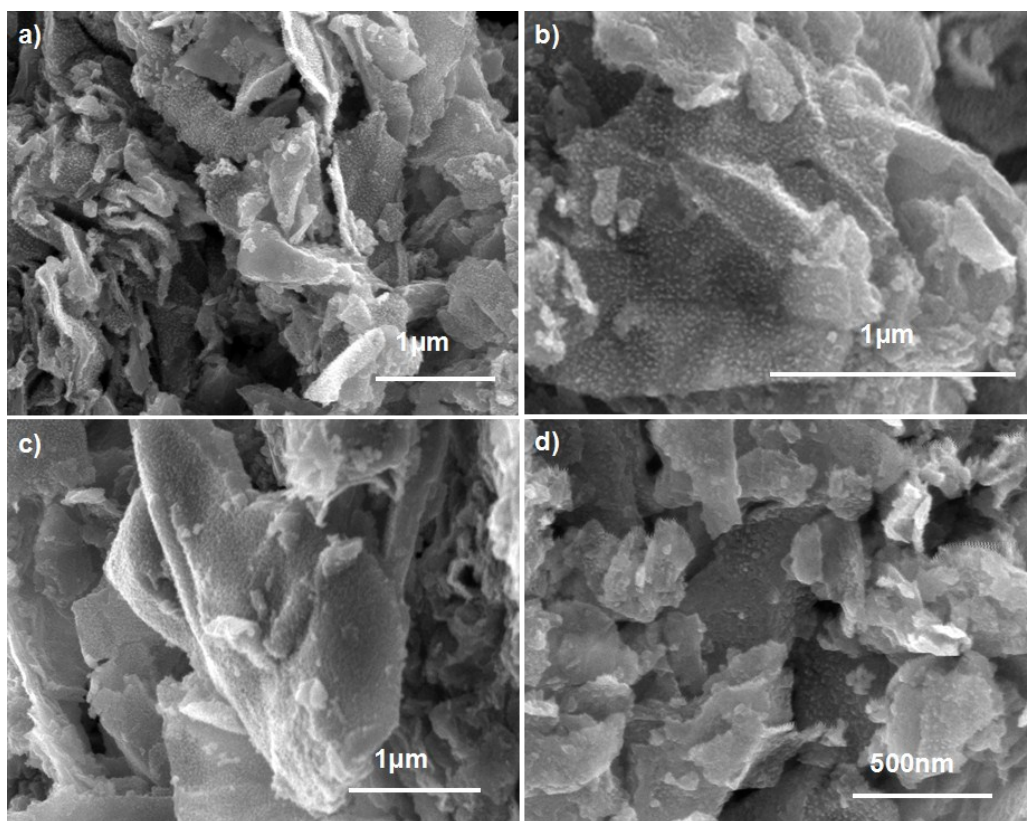

Figure S2. SEM images of a,b) MCG-600, c) MCG-400, and d) MCG-800.

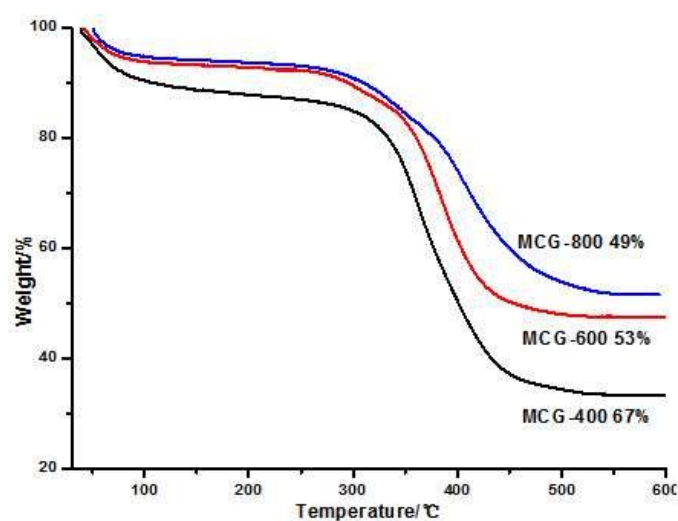

Figure S3. TGA curves of MCGs. According to the loss of weight, the weight contents of graphene and carbon in the MCG-400, MCG-600 and MCG-800 are around 67, 53 and 49 %, respectively.

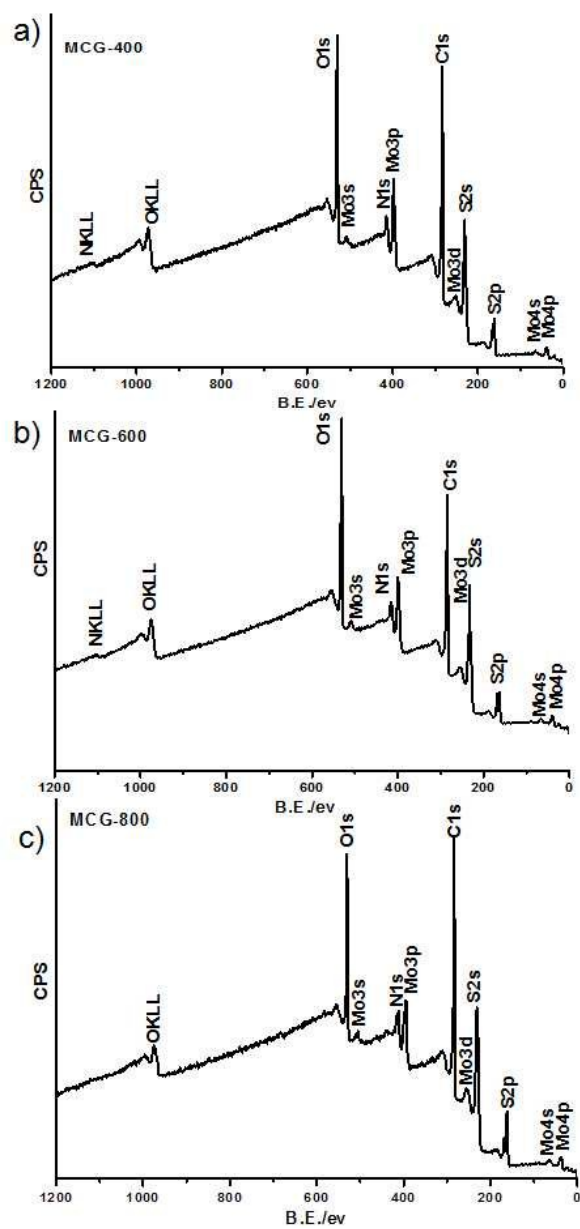

Figure S4. XPS patterns of a) MCG-400, b) MCG-600 and c) MCG-800.

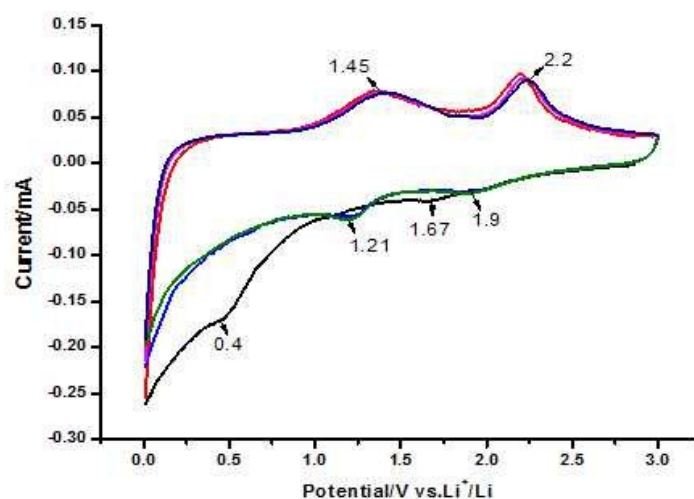

Figure S5. The first three cycles of the CV curves from MCG-600 (measured in the voltage range of 0.001- 3 V at a scanning rate of 0.001 mV s<sup>-1</sup>).
